# Supplementary material for: Poly[glycidyl oligo(oxyethylene)carbamate]s (PGn-EOmR′ and R-PGn-EOmR′): controlled synthesis and effects of molecular parameters (n and m), side groups (R′), and end-groups (R) on thermoresponsive properties
Source: Royal Society of Chemistry journal article supplement (doi:10.1039/d1py00070e), 2021-01-01
Supplement: d1py00070e1.pdf [file d1py00070e1.pdf]

## Supporting Information

# Poly[Glycidyl Oligo(oxyethylene)carbamate]s ( $\text{PG}_n\text{-EO}_m\text{R}'$ and $\text{R-PG}_n\text{-EO}_m\text{R}'$ ): Controlled Synthesis and Effects of Molecular Parameters ( $n$ and $m$ ), Side Group ( $\text{R}'$ ), and End-Group ( $\text{R}$ ) on Thermoresponsive Property

Tingyu He,<sup>a</sup> Yanqiu Wang,<sup>a</sup> Liang Xu,<sup>a</sup> Xiangming Fu,<sup>a</sup> Atsushi Narumi,<sup>b</sup> Shin-ichiro Sato,<sup>c</sup>  
Xiande Shen <sup>\*,a,d</sup> and Toyoji Kakuchi,<sup>\*,a,c,d</sup>

<sup>a</sup> Research Center for Polymer Materials, School of Materials Science and Engineering, Changchun University of Science and Technology, Weixing Road 7989, Jilin 130022, China

<sup>b</sup> Graduate School of Organic Materials Science, Yamagata University, 4-3-16 Jonan, Yonezawa, Yamagata 992-8510, Japan

<sup>c</sup> Division of Applied Chemistry and Frontier Chemistry Center, Faculty of Engineering, Faculty of Engineering, Hokkaido University, Sapporo, Hokkaido 060-8628, Japan

<sup>d</sup> Chongqing Research Institute, Changchun University of Science and Technology, No. 618 Liangjiang Avenue, Longxing Town, Yubei District, Chongqing City 401135, China

\* E-mail: shenxiande@cust.edu.cn (X. S.) and kakuchi@eng.hokudai.ac.jp (T. K.)

## Contents

|                                                                                                                                                                                     |    |
|-------------------------------------------------------------------------------------------------------------------------------------------------------------------------------------|----|
| 1. Synthesis of 3,6-dioxaoctyl isocyanate ( $\text{ICEO}_2\text{Et}$ ) .....                                                                                                        | S1 |
| 2. SEC traces of $t\text{BBA-PBnGE}_n$ , $\text{R-PBnGE}_n$ , $\text{PG}_n$ , $\text{R-PG}_n$ , $\text{PG}_n\text{-EO}_m\text{R}'$ , and $\text{R-PG}_n\text{-EO}_m\text{R}'$ ..... | S2 |
| 3. $^1\text{H}$ NMR spectrum for the polymerization mixture .....                                                                                                                   | S4 |
| 4. $^1\text{H}$ and $^{13}\text{C}$ NMR spectra of $\text{R-PBnGE}_n$ and $\text{R-PG}_n\text{-EO}_m\text{R}'$ .....                                                                | S5 |
| 5. Tables for the synthesis and characterization of $\text{PG}$ , $\text{R-PG}$ , $\text{PG-EO}_m\text{R}'$ , and $\text{R-PG-EO}_m\text{R}'$ .....                                 | S6 |

## 1. Synthesis of 3,6-dioxaoctyl isocyanate (ICEO<sub>2</sub>Et)

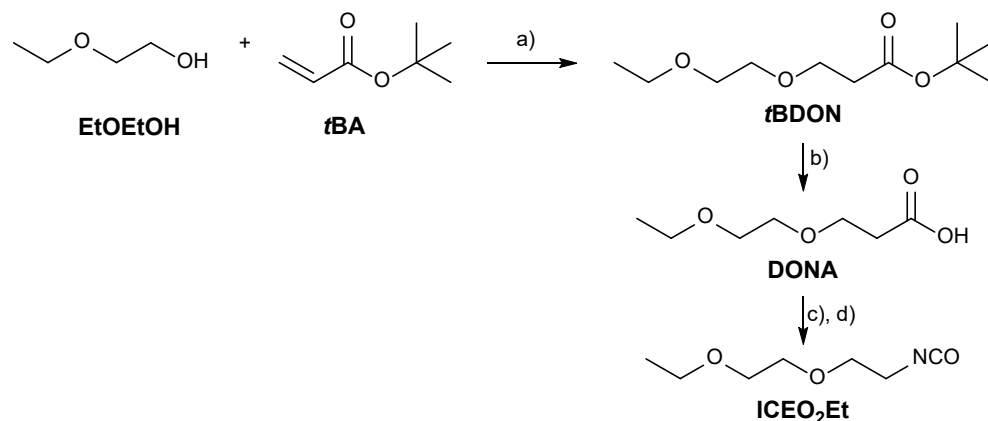

**Scheme S1.** Reagents and conditions:<sup>1)</sup> a) NaH, in THF at room temp for 48 h under N<sub>2</sub>, b) TFA, in dichloromethane at room temp. under N<sub>2</sub> for 42 h, c) DPPA, TEA, in toluene for 2 h under N<sub>2</sub> at room temperature d) heating at 70 °C for 3 h.

2-Ethoxyethanol (EtOEtOH) (20 g, 222 mmol) and *tert*-butyl acrylate (*t*BA) (29.0 mL, 200 mmol) were added to sodium hydride (NaH; 53.3 mg, 2.22 mmol) in dry THF (130 mL). After stirring at room temperature for 48 h under N<sub>2</sub> atmosphere, the solvent was removed by rotary evaporation, then the remaining product was purified by column chromatography using ethyl acetate to afford 3-(2-ethoxyethoxy)propionic acid (DONA) as a colorless oily liquid. Yield, 40 g (82.6%). Trifluoroacetic acid (TFA; 62.8 g, 500 mmol) was added to *t*BDON (40 g, 183 mmol) in dichloromethane (116 mL), and the reaction mixture was stirred at room temperature under N<sub>2</sub> for 42 h. After removing the solvent, the residual product was distilled under reduced pressure to give a colorless and transparent liquid of 3-(2-ethoxyethoxy) propionic acid (DONA). Yield, 20.8 g (70.1%).<sup>2)</sup>

Triethylamine (TEA; 17.6 mL, 127 mmol) and diphenyl phosphoryl azide (DPPA; 27.3 mL, 127 mmol) was added to a solution of DONA (20.8 g, 127 mmol) in dry toluene (160 mL). The whole reaction mixture was stirred for 2 h under N<sub>2</sub> at room temperature, then heated to 70 °C for 3 h. After removing the solvent, the obtained product was distilled under reduced pressure to give a colorless and transparent liquid of ICEO<sub>2</sub>Et.<sup>2)</sup> Yield, 54.7 %; <sup>1</sup>H NMR (500 MHz, CDCl<sub>3</sub>): δ [ppm] = 3.69–3.58 (m, 6H, –OCH<sub>2</sub>– and –CH<sub>2</sub>CH<sub>2</sub>NCO), 3.52 (q, 2H, *J* = 7.25 Hz, –OCH<sub>2</sub>CH<sub>3</sub>), 3.40 (t, 2H, *J* = 6.49 Hz, –CH<sub>2</sub>NCO), 1.21 (t, 3H, *J* = 7.23 Hz, –OCH<sub>2</sub>CH<sub>3</sub>). <sup>13</sup>C NMR (100 MHz, CDCl<sub>3</sub>): δ [ppm] = 125.0, 70.71, 70.32, 69.86, 66.71, 43.10, 15.24.

## References

- 1) N. Sakai, M. Jin, S. Sato, T. Satoh and T. Kakuchi, *Polym. Chem.*, 2014, **5**, 1057–1062.
- 2) T. R. Yerramreddy, M. Milewski, N. R. Penthala, A. L. Stinchcomb and P. A. Crooks, *Bioorg. Med. Chem. Lett.*, 2010, **20**, 3280–3283.

## 2. SEC traces of $t$ BBA-PBnGE $_n$ , R-PBnGE $_n$ , PG $_n$ , R-PG $_n$ , PG $_n$ -EO $_m$ R', and R-PG $_n$ -EO $_m$ R'

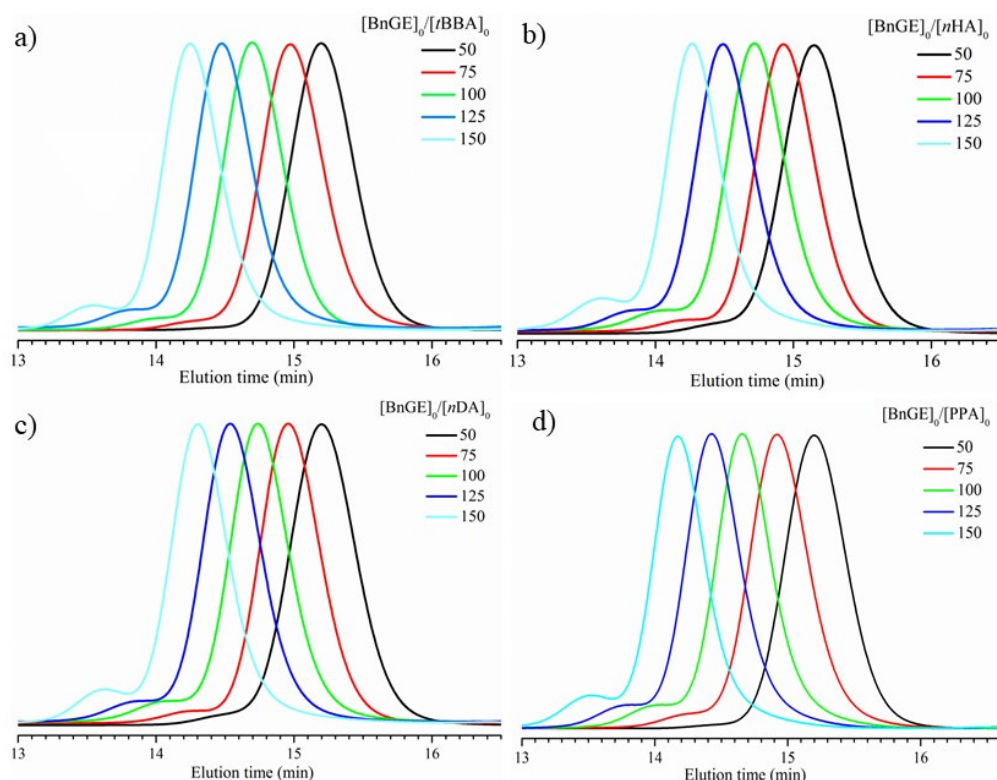

**Fig. S1.** SEC traces of a)  $t$ BBA-PBnGE $_n$ , b)  $n$ HA-PBnGE $_n$ , c)  $n$ DA-PBnGE $_n$ , and d) PPA-PBnGE $_n$  obtained by the organocatalytic ROP of BnGE using  $t$ BBA,  $n$ HA,  $n$ DA, and PPA, respectively (eluent, THF; flow rate, 1 mL min $^{-1}$ ; PS standard).

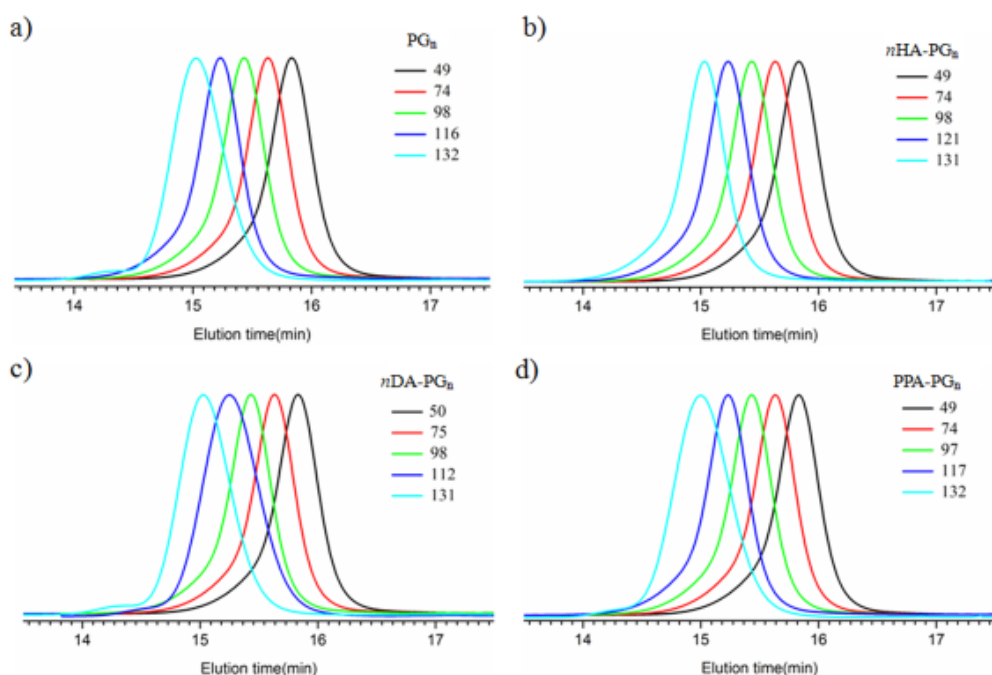

**Fig. S2.** SEC traces of a) PG $_n$ , b)  $n$ HA-PG $_n$ , c)  $n$ DA-PG $_n$ , and d) PPA-PG $_n$  (eluent, H $_2$ O in the presence of 0.05 % NaN $_3$ ; flow rate, 1 mL min $^{-1}$ ; PEG standard).

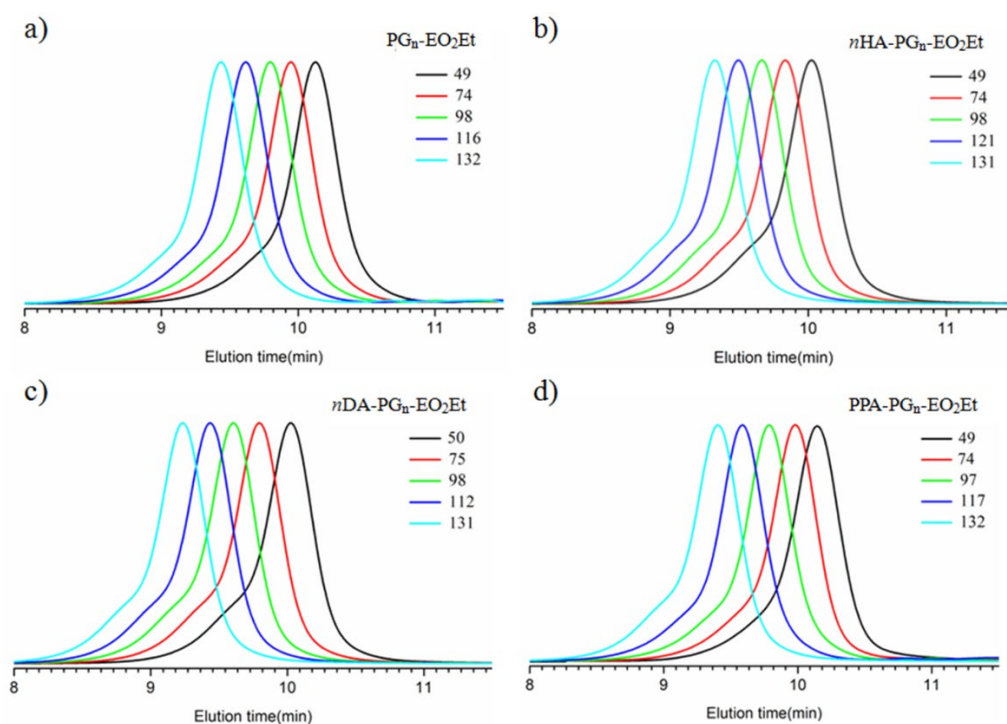

**Fig. S3.** SEC traces of a)  $PG_n-EO_2Et$ , b)  $nHA-PG_n-EO_2Et$ , c)  $nDA-PG_n-EO_2Et$ , and d)  $PPA-PG_n-EO_2Et$  (eluent,  $H_2O$  in the presence of 0.05 %  $NaN_3$ ; flow rate,  $1\text{ mL min}^{-1}$ ; PEG standard).

### 3. $^1\text{H}$ NMR spectrum for the polymerization mixture

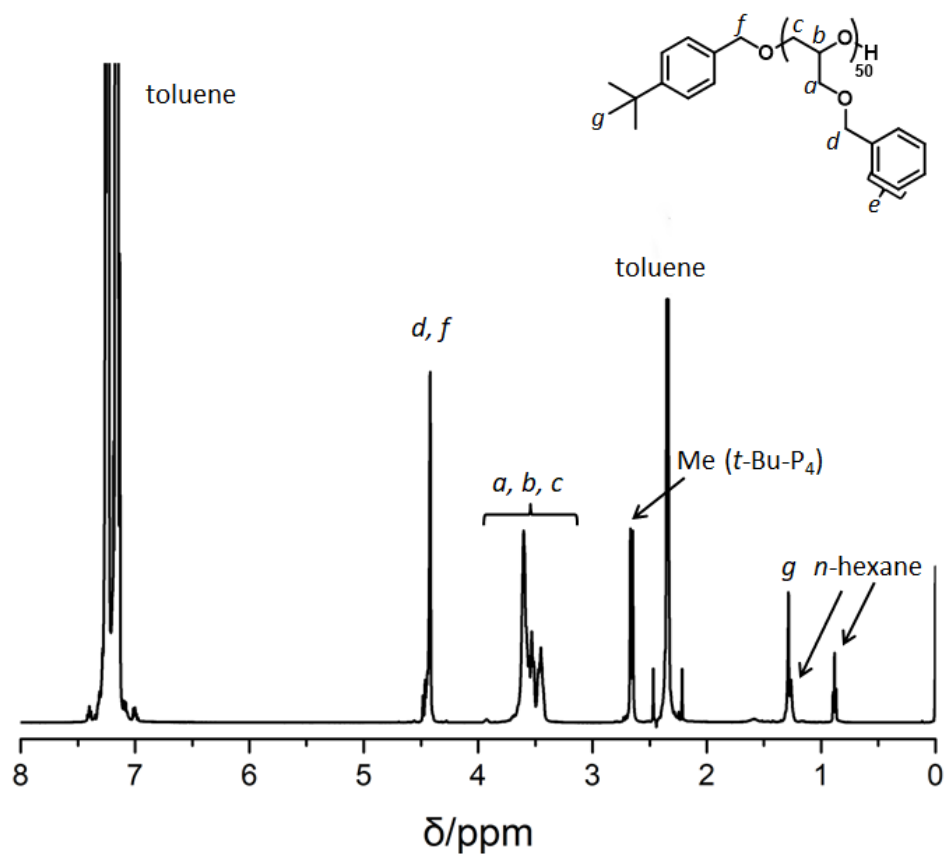

**Fig. S4.**  $^1\text{H}$  NMR spectrum ( $\text{CDCl}_3$ ) of the mixture after the polymerization of BnGE in toluene using *t*BBA as the initiator and *t*-Bu- $\text{P}_4$  (1.0 M solution in *n*-hexane) as the organocatalyst for 20 h ( $[\text{BnGE}]_0/[\text{tBBA}]_0 = 50$ ).

#### 4. $^1\text{H}$ and $^{13}\text{C}$ NMR spectra of R-PBnGE $_n$ and R-PG $_n$ -EO $_m$ R'

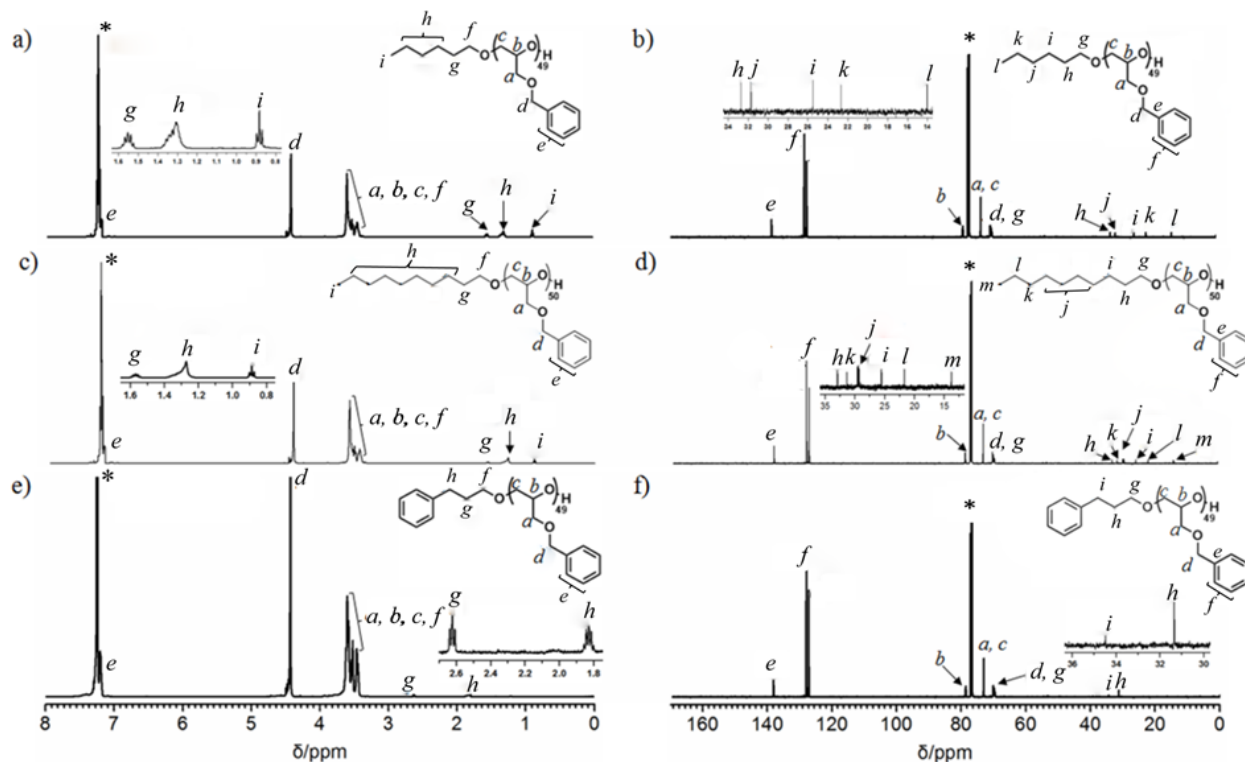

**Fig. S5.**  $^1\text{H}$  NMR spectra (CDCl<sub>3</sub>) of a)  $n\text{HA-PBnGE}_{49}$ , c)  $n\text{DA-PBnGE}_{50}$ , and e)  $\text{PPA-PBnGE}_{49}$  and  $^{13}\text{C}$  NMR spectra (CDCl<sub>3</sub>) of b)  $n\text{HA-PBnGE}_{49}$ , d)  $n\text{DA-PBnGE}_{50}$ , and f)  $\text{PPA-PBnGE}_{49}$ . The symbol \* refers to solvent peaks.

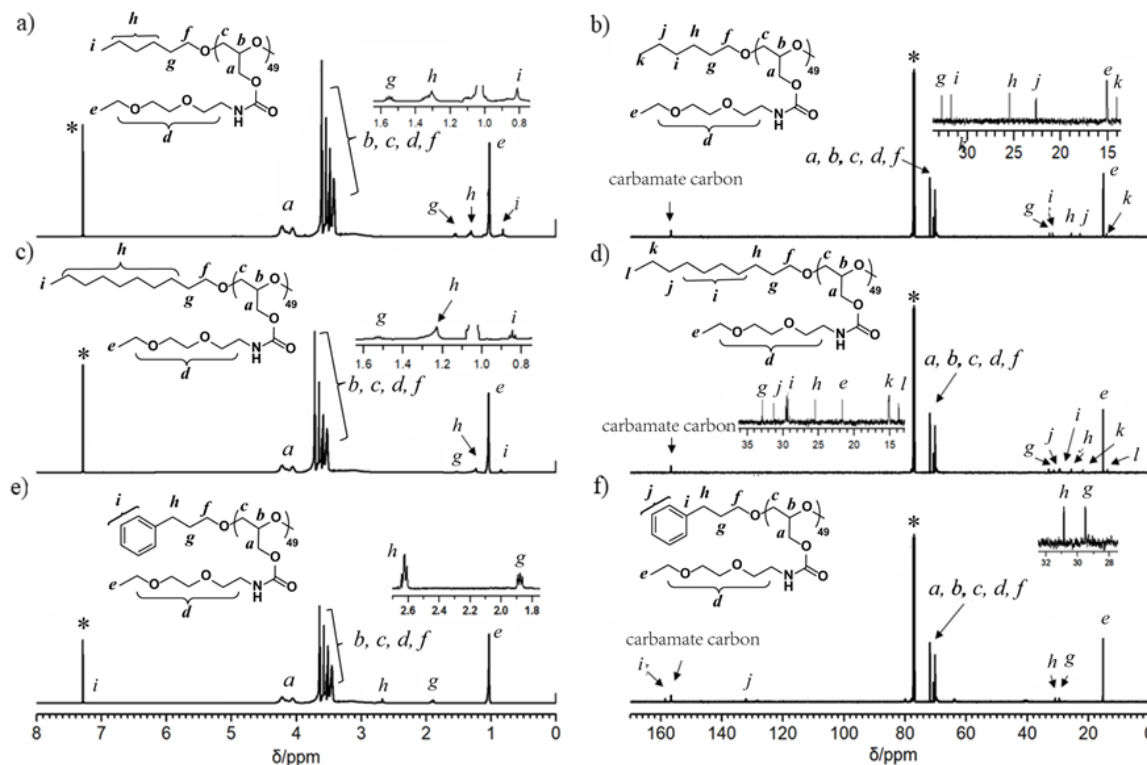

**Fig. S6.**  $^1\text{H}$  NMR spectra (CDCl<sub>3</sub>) of a)  $n\text{HA-PG}_{49}\text{-EO}_2\text{Et}$ , c)  $n\text{DA-PG}_{49}\text{-EO}_2\text{Et}$ , and e)  $\text{PPA-PG}_{49}\text{-EO}_2\text{Et}$  and  $^{13}\text{C}$  NMR spectra (CDCl<sub>3</sub>) of b)  $n\text{HA-PG}_{49}\text{-EO}_2\text{Et}$ , d)  $n\text{DA-PG}_{49}\text{-EO}_2\text{Et}$ , and f)  $\text{PPA-PG}_{49}\text{-EO}_2\text{Et}$ . The symbol \* refers to solvent peaks.

## 5. Tables for the synthesis and characterization of PG, R-PG, PG-EO<sub>m</sub>R', and R-PG-EO<sub>m</sub>R'

**Table S1.** Synthesis and characterization of PG, *n*HA-PG<sub>*n*</sub>, *n*DA-PG<sub>*n*</sub>, and PPA-PG<sub>*n*</sub>, which were obtained by the deprotection reactions of *t*BBA-PBnGE<sub>*n*</sub>, *n*HA-PBnGE<sub>*n*</sub>, *n*DA-PBnGE<sub>*n*</sub>, and PPA-PBnGE<sub>*n*</sub>, respectively

| entry | starting material                 | yield in % | product                       |                               |
|-------|-----------------------------------|------------|-------------------------------|-------------------------------|
|       |                                   |            | Code                          | $M_{n,NMR}^a$ ( $M_w/M_n^b$ ) |
| 38    | <i>t</i> BBA-PBnGE <sub>49</sub>  | quant.     | PG <sub>49</sub>              | 3600 <sup>c</sup> (1.11)      |
| 39    | <i>t</i> BBA-PBnGE <sub>74</sub>  | quant.     | PG <sub>74</sub>              | 5500 <sup>c</sup> (1.12)      |
| 40    | <i>t</i> BBA-PBnGE <sub>98</sub>  | 99.3       | PG <sub>98</sub>              | 7200 <sup>c</sup> (1.13)      |
| 41    | <i>t</i> BBA-PBnGE <sub>116</sub> | 92.6       | PG <sub>116</sub>             | 8000 <sup>c</sup> (1.13)      |
| 42    | <i>t</i> BBA-PBnGE <sub>132</sub> | 90.8       | PG <sub>132</sub>             | 8800 <sup>c</sup> (1.14)      |
| 43    | <i>n</i> HA-PBnGE <sub>49</sub>   | quant.     | <i>n</i> HA-PG <sub>49</sub>  | 3700 (1.11)                   |
| 44    | <i>n</i> HA-PBnGE <sub>74</sub>   | quant.     | <i>n</i> HA-PG <sub>74</sub>  | 5500 (1.12)                   |
| 45    | <i>n</i> HA-PBnGE <sub>98</sub>   | quant.     | <i>n</i> HA-PG <sub>98</sub>  | 7300 (1.12)                   |
| 46    | <i>n</i> HA-PBnGE <sub>121</sub>  | 96.5       | <i>n</i> HA-PG <sub>121</sub> | 8700 (1.13)                   |
| 47    | <i>n</i> HA-PBnGE <sub>131</sub>  | 91.7       | <i>n</i> HA-PG <sub>131</sub> | 9700 (1.14)                   |
| 48    | <i>n</i> DA-PBnGE <sub>50</sub>   | quant.     | <i>n</i> DA-PG <sub>50</sub>  | 3800 (1.12)                   |
| 49    | <i>n</i> DA-PBnGE <sub>75</sub>   | quant.     | <i>n</i> DA-PG <sub>75</sub>  | 5700 (1.12)                   |
| 50    | <i>n</i> DA-PBnGE <sub>98</sub>   | quant.     | <i>n</i> DA-PG <sub>98</sub>  | 7400 (1.13)                   |
| 51    | <i>n</i> DA-PBnGE <sub>112</sub>  | 98.1       | <i>n</i> DA-PG <sub>112</sub> | 8200 (1.14)                   |
| 52    | <i>n</i> DA-PBnGE <sub>131</sub>  | 90.3       | <i>n</i> DA-PG <sub>131</sub> | 8800 (1.15)                   |
| 53    | PPA-PBnGE <sub>49</sub>           | quant.     | PPA-PG <sub>49</sub>          | 3700 (1.12)                   |
| 54    | PPA-PBnGE <sub>74</sub>           | quant.     | PPA-PG <sub>74</sub>          | 5600 (1.13)                   |
| 55    | PPA-PBnGE <sub>97</sub>           | 98.2       | PPA-PG <sub>97</sub>          | 7100 (1.14)                   |
| 56    | PPA-PBnGE <sub>117</sub>          | 92.9       | PPA-PG <sub>117</sub>         | 8000 (1.15)                   |
| 57    | PPA-PBnGE <sub>132</sub>          | 90.5       | PPA-PG <sub>132</sub>         | 8900 (1.15)                   |

<sup>a</sup>The number average molecular weight determined by <sup>1</sup>H NMR spectra in CD<sub>3</sub>OD. <sup>b</sup>The molecular weight distribution determined by SEC in H<sub>2</sub>O in the presence of 0.05 % NaN<sub>3</sub> using PEG standards. <sup>c</sup>The weight average molecular weight determined by the SEC equipped with a MALS ( $M_{w,MALS}$ ) in DMF in the presence of 0.01 M LiCl.

**Table S2.** Synthesis and characterization of  $n$ HA-PG $_n$ -EO<sub>2</sub>Et,  $n$ DA-PG $_n$ -EO<sub>2</sub>Et, and PPA-PG $_n$ -EO<sub>2</sub>Et, which were obtained by the post-modification reactions of  $n$ HA-PG $_n$ ,  $n$ DA-PG $_n$ , and PPA-PG $_n$  with ICEO<sub>2</sub>Et, respectively

| entry | starting material        | yield in % | product                                      |                               |                  |               |             |
|-------|--------------------------|------------|----------------------------------------------|-------------------------------|------------------|---------------|-------------|
|       |                          |            | code                                         | $M_{n,NMR}^a$ ( $M_w/M_n^b$ ) | $T_{cp}^c$ in °C | $R_h^d$ in nm |             |
|       |                          |            |                                              |                               |                  | at 25 °C      | at $T_{cp}$ |
| 58    | $n$ HA-PG <sub>49</sub>  | 81.5       | $n$ HA-PG <sub>49</sub> -EO <sub>2</sub> Et  | 11400 (1.14)                  | 40.1             | 2.5           | 650         |
| 59    | $n$ HA-PG <sub>74</sub>  | 81.1       | $n$ HA-PG <sub>74</sub> -EO <sub>2</sub> Et  | 17800 (1.16)                  | 38.6             | 3.1           | 672         |
| 60    | $n$ HA-PG <sub>98</sub>  | 78.6       | $n$ HA-PG <sub>98</sub> -EO <sub>2</sub> Et  | 22800 (1.19)                  | 37.4             | 3.6           | 681         |
| 61    | $n$ HA-PG <sub>121</sub> | 79.4       | $n$ HA-PG <sub>121</sub> -EO <sub>2</sub> Et | 24100 (1.20)                  | 36.4             | 4.2           | 696         |
| 62    | $n$ HA-PG <sub>131</sub> | 70.1       | $n$ HA-PG <sub>131</sub> -EO <sub>2</sub> Et | 31600 (1.22)                  | 34.5             | 5.5           | 708         |
| 63    | $n$ DA-PG <sub>50</sub>  | 79.6       | $n$ DA-PG <sub>50</sub> -EO <sub>2</sub> Et  | 11800 (1.16)                  | 36.1             | 2.8           | 806         |
| 64    | $n$ DA-PG <sub>75</sub>  | 80.4       | $n$ DA-PG <sub>75</sub> -EO <sub>2</sub> Et  | 18300 (1.17)                  | 35.4             | 3.3           | 820         |
| 65    | $n$ DA-PG <sub>98</sub>  | 72.5       | $n$ DA-PG <sub>98</sub> -EO <sub>2</sub> Et  | 22900 (1.19)                  | 34.2             | 3.9           | 835         |
| 66    | $n$ DA-PG <sub>112</sub> | 73.9       | $n$ DA-PG <sub>112</sub> -EO <sub>2</sub> Et | 27200 (1.21)                  | 33.6             | 4.8           | 859         |
| 67    | $n$ DA-PG <sub>131</sub> | 68.4       | $n$ DA-PG <sub>131</sub> -EO <sub>2</sub> Et | 31900 (1.24)                  | 33.0             | 5.9           | 878         |
| 68    | PPA-PG <sub>49</sub>     | 78.5       | PPA-PG <sub>49</sub> -EO <sub>2</sub> Et     | 11500 (1.15)                  | 32.5             | 2.8           | 623         |
| 69    | PPA-PG <sub>74</sub>     | 72.5       | PPA-PG <sub>74</sub> -EO <sub>2</sub> Et     | 17300 (1.17)                  | 30.6             | 3.5           | 648         |
| 70    | PPA-PG <sub>97</sub>     | 71.0       | PPA-PG <sub>97</sub> -EO <sub>2</sub> Et     | 22800 (1.18)                  | 29.5             | 4.0           | 670         |
| 71    | PPA-PG <sub>117</sub>    | 73.2       | PPA-PG <sub>117</sub> -EO <sub>2</sub> Et    | 28600 (1.20)                  | 29.0             | 5.1           | 681         |
| 72    | PPA-PG <sub>132</sub>    | 67.5       | PPA-PG <sub>132</sub> -EO <sub>2</sub> Et    | 31800 (1.22)                  | 28.2             | 6.0           | 698         |

<sup>a</sup>The number average molecular weight determined by <sup>1</sup>H NMR spectra in CDCl<sub>3</sub>. <sup>b</sup>The molecular weight distribution determined by SEC in H<sub>2</sub>O in the presence of 0.05 % NaN<sub>3</sub> using PEG standards. <sup>c</sup>The cloud point temperature determined by UV-vis measurements in water (10 g L<sup>-1</sup>). <sup>d</sup>The average hydrodynamic radii determined by DLS measurements in water (10 g L<sup>-1</sup>).



**Table S3.** Synthesis and characterization of  $n$ HA-PG $_n$ -EO<sub>3</sub>Et,  $n$ DA-PG $_n$ -EO<sub>3</sub>Et, and PPA-PG $_n$ -EO<sub>3</sub>Et, which were obtained by the post-modification reactions of  $n$ HA-PG $_n$ ,  $n$ DA-PG $_n$ , and PPA-PG $_n$  with ICEO<sub>3</sub>Et, respectively

| entry | starting material        | yield in % | product                                      |                               |                  |               |             |
|-------|--------------------------|------------|----------------------------------------------|-------------------------------|------------------|---------------|-------------|
|       |                          |            | code                                         | $M_{n,NMR}^a$ ( $M_w/M_n^b$ ) | $T_{cp}^c$ in °C | $R_h^d$ in nm |             |
|       |                          |            |                                              |                               |                  | at 25 °C      | at $T_{cp}$ |
| 73    | $n$ HA-PG <sub>49</sub>  | 80.5       | $n$ HA-PG <sub>49</sub> -EO <sub>3</sub> Et  | 13500 (1.16)                  | 57.4             | 4.0           | 905         |
| 74    | $n$ HA-PG <sub>74</sub>  | 80.9       | $n$ HA-PG <sub>74</sub> -EO <sub>3</sub> Et  | 21100 (1.17)                  | 56.6             | 5.4           | 924         |
| 75    | $n$ HA-PG <sub>98</sub>  | 79.6       | $n$ HA-PG <sub>98</sub> -EO <sub>3</sub> Et  | 26900 (1.19)                  | 55.1             | 6.2           | 953         |
| 76    | $n$ HA-PG <sub>121</sub> | 80.4       | $n$ HA-PG <sub>121</sub> -EO <sub>3</sub> Et | 29400 (1.19)                  | 54.5             | 6.8           | 983         |
| 77    | $n$ HA-PG <sub>131</sub> | 75.1       | $n$ HA-PG <sub>131</sub> -EO <sub>3</sub> Et | 37300 (1.22)                  | 53.8             | 7.4           | 1021        |
| 78    | $n$ DA-PG <sub>50</sub>  | 80.6       | $n$ DA-PG <sub>50</sub> -EO <sub>3</sub> Et  | 14000 (1.17)                  | 50.3             | 4.5           | 931         |
| 79    | $n$ DA-PG <sub>75</sub>  | 79.4       | $n$ DA-PG <sub>75</sub> -EO <sub>3</sub> Et  | 21600 (1.17)                  | 49.5             | 5.6           | 950         |
| 80    | $n$ DA-PG <sub>98</sub>  | 79.5       | $n$ DA-PG <sub>98</sub> -EO <sub>3</sub> Et  | 27200 (1.18)                  | 48.2             | 6.4           | 972         |
| 81    | $n$ DA-PG <sub>112</sub> | 74.9       | $n$ DA-PG <sub>112</sub> -EO <sub>3</sub> Et | 32100 (1.19)                  | 47.3             | 6.9           | 1027        |
| 82    | $n$ DA-PG <sub>131</sub> | 70.4       | $n$ DA-PG <sub>131</sub> -EO <sub>3</sub> Et | 37600 (1.22)                  | 46.5             | 7.6           | 1068        |
| 83    | PPA-PG <sub>49</sub>     | 79.5       | PPA-PG <sub>49</sub> -EO <sub>3</sub> Et     | 13600 (1.18)                  | 45.3             | 4.2           | 887         |
| 84    | PPA-PG <sub>74</sub>     | 72.5       | PPA-PG <sub>74</sub> -EO <sub>3</sub> Et     | 20500 (1.19)                  | 43.2             | 5.3           | 902         |
| 85    | PPA-PG <sub>97</sub>     | 70.5       | PPA-PG <sub>97</sub> -EO <sub>3</sub> Et     | 27000 (1.21)                  | 42.0             | 6.4           | 922         |
| 86    | PPA-PG <sub>117</sub>    | 71.2       | PPA-PG <sub>117</sub> -EO <sub>3</sub> Et    | 33700 (1.21)                  | 40.5             | 6.7           | 961         |
| 87    | PPA-PG <sub>132</sub>    | 68.5       | PPA-PG <sub>132</sub> -EO <sub>3</sub> Et    | 37600 (1.23)                  | 39.2             | 7.2           | 998         |

<sup>a</sup>The number average molecular weight determined by <sup>1</sup>H NMR spectra in CDCl<sub>3</sub>. <sup>b</sup>The molecular weight distribution determined by SEC in H<sub>2</sub>O in the presence of 0.05 % NaN<sub>3</sub> using PEG standards. <sup>c</sup>The cloud point temperature determined by UV-vis measurements in water (10 g L<sup>-1</sup>). <sup>d</sup>The average hydrodynamic radii determined by DLS measurements in water (10 g L<sup>-1</sup>).
